# Supplementary material for: Dopamine-melanin nanoparticles scavenge reactive oxygen and nitrogen species and activate autophagy for osteoarthritis therapy
Source: Royal Society of Chemistry journal article supplement (doi:10.1039/c9nr03060c), 2019-01-01
Supplement: c9nr03060c1.pdf [file c9nr03060c1.pdf]

**Supporting Information for**

**Dopamine-melanin nanoparticles scavenge  
reactive oxygen and nitrogen species and activate  
autophagy for osteoarthritis therapy**

*Gang Zhong,<sup>a</sup> Xueyuan Yang,<sup>b</sup> Xianfang Jiang,<sup>c</sup> Anil Kumar,<sup>b</sup> Huiping Long,<sup>d</sup> Jin Xie<sup>b,\*</sup>, Li  
Zheng<sup>a,\*</sup>, Jinmin Zhao<sup>a</sup>*

<sup>a</sup> Department of Orthopaedics Trauma and Hand Surgery, The First Affiliated Hospital of  
Guangxi Medical University, Nanning, 530021, China

<sup>b</sup> Department of Chemistry, University of Georgia, Athens, Georgia 30602, USA.

<sup>c</sup> The College of Stomatology, Guangxi Medical University, Nanning, 530021, China

<sup>d</sup> Department of Neurology, Second Affiliated Hospital of Guangxi Medical University,  
Nanning, 530007, China

\* Corresponding author: zhengli224@163.com, jinxie@uga.edu

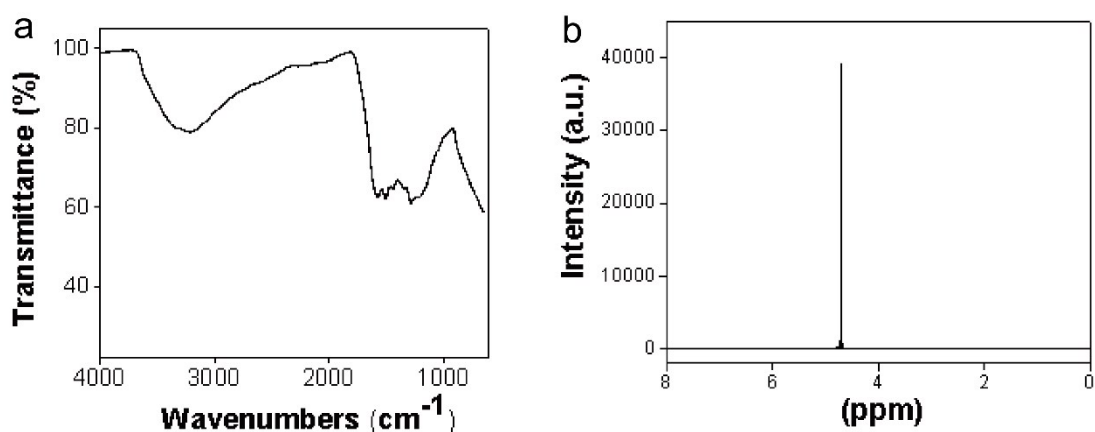

**Figure S1.** (a) FT-IR spectrum of DM nanoparticles. The peak at  $\sim 3200\text{ cm}^{-1}$  corresponds to the stretching vibrations of -OH and N-H. The peaks at  $1574\text{ cm}^{-1}$  and  $1281\text{ cm}^{-1}$  were attributed to the C=O and C-O bonds, respectively. The peak at  $1442\text{ cm}^{-1}$  corresponds to C=C. (b)  $^1\text{H}$  NMR spectrum of DM nanoparticles. The peak at  $\sim 4.7\text{ ppm}$  in the  $^1\text{H}$  NMR spectrum is attributed to the  $\text{D}_2\text{O}$  solution.

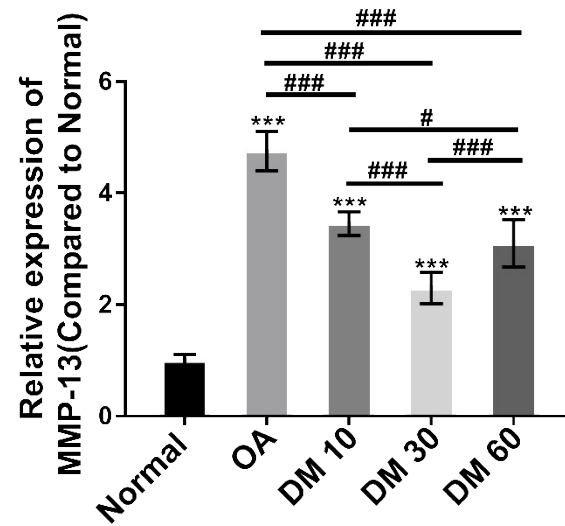

**Figure S2.** Quantitative analysis immunohistochemical staining of MMP-13 in rat cartilage tissue by Image J. Values are presented as means  $\pm$  SD,  $n=6$ . \* indicates  $P < 0.05$ ; \*\*,  $P < 0.01$ ; \*\*\*,  $P < 0.001$ , relative to the normal group. #, indicate,  $P < 0.05$ ; ##,  $P < 0.01$ ; ###,  $P < 0.001$ , relative to the OA group.

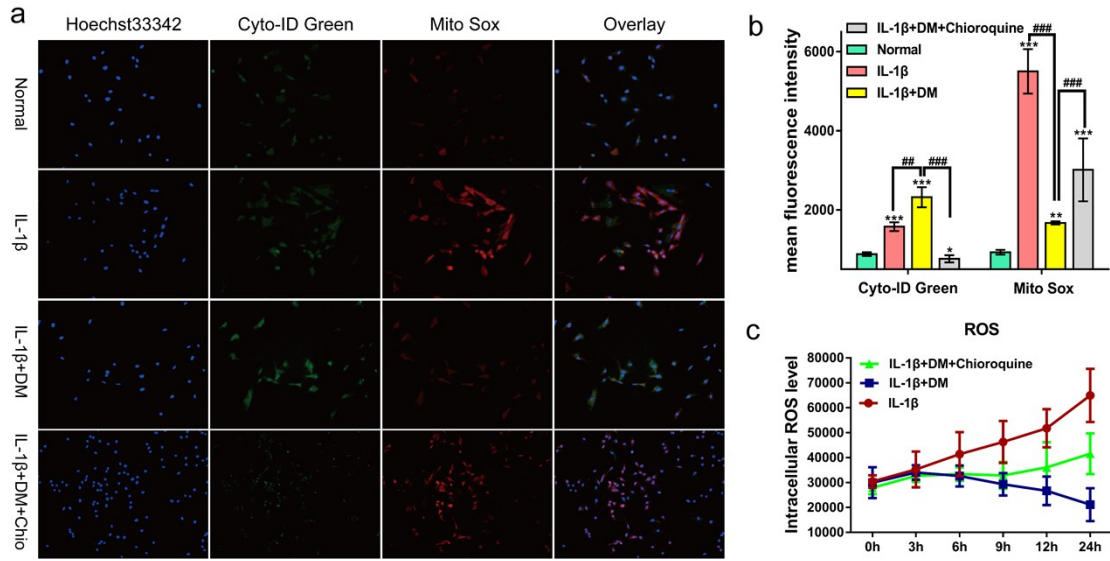

**Figure S3.** Effect of autophagy on free radical scavenging of DM nanoparticles. (a) Chondrocyte samples concurrently stained with Cyto-ID Green dye and MitoSox Red dye were analyzed by confocal microscopy. (b) The fluorescence intensity of chondrocytes was analyzed by Image J. (c) After treated 30  $\mu$ g/mL DM Nanoparticles and/or Chloroquine for 0, 3, 6, 9, 12 and 24 h, the chondrocytes were stained with DCFH for 30 minutes, and the intracellular ROS levels were analyzed on a fluorescence microplate reader. IL-1 $\beta$  (with 10ng/mL IL-1 $\beta$ ); IL-1 $\beta$  +DM (with 10ng/mL IL-1 $\beta$  and 30  $\mu$ g/ml DM nanoparticles); IL-1 $\beta$ +DM+Chloroquine (with 10 ng/mL IL-1 $\beta$ , 30  $\mu$ g/ml DM nanoparticles and 1 $\mu$ mol/L Chloroquine). Values are presented as means  $\pm$  SD. \* indicates  $P < 0.05$ ; \*\*,  $P < 0.01$ ; \*\*\*,  $P < 0.001$ , relative to the normal group. #,  $P < 0.05$ , ##,  $P < 0.01$ , ###,  $P < 0.001$ , relative to the IL-1 $\beta$ +DM group.

**Table 1.** Primer sequences used in qRT-PCR experiments

| Gene name     | Forward primer              | Reverse primer                 |
|---------------|-----------------------------|--------------------------------|
| GAPDH         | 5'-AGGGCCCTGACAACTCTTTT-3'  | 5'-AGGGGTCTACATGGCAACTG-3'     |
| IL-1 $\beta$  | 5'-TGAGCTCGCCAGTGAAATGA-3'  | 5'-CATGGCCACAACAACCTGACG-3'    |
| MMP-13        | 5'-GCCATTACCAGTCTCCGAGG-3'  | 5'-TACGGTTGGGAAGTTCTGGC-3'     |
| TNF- $\alpha$ | 5'-TCAGAGGGCCTGTACCTCAT-3'  | 5'-GGAGGTTGACCTTGGTCTGG-3'     |
| IL-6          | 5'-TCTGCGCAGCTTTAAGGAGT-3'  | 5'-CCCAGTGGACAGGTTTCTGA-3'     |
| COX-2         | 5'-ACACTCTATCACTGGCATCC-3'  | 5'-GAAGGGACACCCTTTCACAT-3'     |
| iNOS          | 5'-GTGTTCCACCAGGAGATGTTG-3' | 5'-CTCCTGCCCCACTGAGTTCCGTTC-3' |
| LC3           | 5'-GACGTCACCGGGCGAGTTA-3'   | 5'-GCTGTACCTCCTTACAGCGG-3'     |
| Beclin-1      | 5'-TCCGGGCTCCCGAGG-3'       | 5'-GGGGGATGAATCTGCGAGAG-3'     |
| ATG7          | 5'-TGGTTACAAGCTTGGCTGCT-3'  | 5'-TCAAGAACCTGGTGAGGCAC-3'     |
